# Supplementary material for: A neural network potential energy surface assisted molecular dynamics study on the pyrolysis behavior of two spiro-hydrocarbons
Source: Royal Society of Chemistry journal article supplement (doi:10.1039/d3cp05425j), 2024-01-01
Supplement: d3cp05425j1.pdf [file d3cp05425j1.pdf]

***Supplemental Material 1 for Phys. Chem. Chem. Phys.***  
**Neural network potential energy surface assisted molecular  
dynamics study on pyrolysis behaviors of two spiro-  
hydrocarbons**

Xiao Hang <sup>a,b</sup>, Bin Yang <sup>a,b</sup>\*

<sup>a</sup> Center for Combustion Energy and Department of Energy and Power Engineering, Tsinghua University, Beijing 100084, China

<sup>b</sup> Key Laboratory for Thermal Science and Power Engineering of MOE, International Joint Laboratory

Table S1. Several key parameters set for training potential energy surfaces.

|             |                  |                       |        |
|-------------|------------------|-----------------------|--------|
| dp_version  | 2.1.5            | Learning rate         |        |
| descriptor  |                  | type                  | exp    |
| type        | se_a             | start_lr              | 0.001  |
| sel         | [52, 40] (Fuel1) | decay_steps           | 400    |
|             | [56, 36] (Fuel2) | training              |        |
| rcut_smth   | 1 Å              | stop_batch            | 400000 |
| rcut        | 6 Å              | dp_compress           | TRUE   |
| neuron      | [25, 50, 100]    | model_devi_dt         | 0.0001 |
| resnet_dt   | FALSE            | model_devi_skip       | 100    |
| axis_neuron | 12               | model_devi_f_trust_lo | 0.15   |
| fitting net |                  | model_devi_f_trust_hi | 0.45   |
| neuron      | [240, 240, 240]  | use_cluster           | TRUE   |
| resnet_dt   | TRUE             | cluster_cutoff        | 3.5 Å  |

\* Corresponding author. E-mail: byang@tsinghua.edu.cn

*on Low Carbon Clean Energy Innovation, Tsinghua University, Beijing, 100084, P. R. China*

Table S2. Temperature, time, and “Accuracy” for each iteration of training for two fuels.

| Fuel 1    |      |             |          | Fuel 2    |            |         |          |
|-----------|------|-------------|----------|-----------|------------|---------|----------|
| Iteration | T/K  | Time/p<br>s | Accuracy | Iteration | T/K        | Time/ps | Accuracy |
| 0         | 2500 | 0.2         | 83.86%   | 0         | 2500, 2800 | 0.2     | 67.06%   |
| 1         | 2500 | 0.2         | 98.75%   | 1         | 2500, 2800 | 0.2     | 94.64%   |
| 2         | 2500 | 0.2         | 98.96%   | 2         | 2500, 2800 | 0.2     | 96.91%   |
| 3_check   | 2500 | 0.2         | 99.02%   | 3         | 2500, 2800 | 0.2     | 98.62%   |
| 3         | 2500 | 0.4         | 99.01%   | 4_check   | 2500, 2800 | 0.2     | 99.08%   |
| 4         | 2500 | 0.8         | 98.84%   | 4         | 2500, 2800 | 0.4     | 98.87%   |
| 5         | 2500 | 0.8         | 98.42%   | 5         | 2500, 2800 | 0.4     | 98.41%   |
| 6         | 2500 | 0.8         | 98.91%   | 6_check   | 2500, 2800 | 0.4     | 99.07%   |
| 7         | 2500 | 0.8         | 98.86%   | 6         | 2500, 2800 | 0.8     | 98.89%   |
| 8         | 2500 | 0.8         | 98.62%   | 7         | 2500, 2800 | 0.8     | 98.76%   |
| 9_check   | 2500 | 0.8         | 99.21%   | 8         | 2500, 2800 | 0.8     | 98.78%   |
| 9         | 2500 | 1.6         | 99.03%   | 9_check   | 2500, 2800 | 0.8     | 99.02%   |
| 10        | 2500 | 1.6         | 97.93%   | 9         | 2500, 2800 | 1.6     | 98.75%   |
| 11_check  | 2500 | 1.6         | 99.20%   | 10_check  | 2500, 2800 | 1.6     | 99.04%   |
| 11        | 2500 | 3.2         | 98.87%   | 10        | 2500, 2800 | 3.2     | 98.88%   |
| 12        | 2500 | 3.2         | 95.42%   | 11_check  | 2500, 2800 | 3.2     | 99.03%   |
| 13        | 2500 | 3.2         | 98.15%   | 11        | 2500, 2800 | 6.4     | 98.72%   |
| 14        | 2500 | 3.2         | 97.96%   | 12        | 2500, 2800 | 6.4     | 98.27%   |
| 15        | 2500 | 3.2         | 98.40%   | 13        | 2500, 2800 | 6.4     | 98.64%   |
| 16        | 2500 | 3.2         | 98.36%   | 14        | 2500, 2800 | 6.4     | 98.09%   |
| 17        | 2500 | 3.2         | 98.01%   | 15_check  | 2500, 2800 | 6.4     | 99.04%   |
| 18_check  | 2500 | 3.2         | 99.47%   | 15        | 2500, 2800 | 12.8    | 98.80%   |
| 18        | 2500 | 6.4         | 99.36%   | 16        | 2500, 2800 | 12.8    | 98.82%   |
| 19        | 2500 | 6.4         | 98.95%   | 17        | 2500, 2800 | 12.8    | 97.94%   |
| 20_check  | 2500 | 6.4         | 99.34%   | 18        | 2500, 2800 | 12.8    | 98.70%   |
| 20        | 2500 | 12.8        | 99.07%   | 19_check  | 2500, 2800 | 12.8    | 99.06%   |
| 21        | 2500 | 12.8        | 98.07%   | 19        | 2500, 2800 | 25.6    | 99.01%   |
| 22        | 2500 | 12.8        | 96.57%   | 20        | 2500, 2800 | 25.6    | 98.93%   |
| 23        | 2500 | 12.8        | 97.64%   | 21_check  | 2500, 2800 | 25.6    | 99.38%   |
| 24        | 2500 | 12.8        | 98.66%   | 21        | 2500, 2800 | 51.2    | 98.93%   |
| 25_check  | 2500 | 12.8        | 99.22%   | 22        | 2500, 2800 | 51.2    | 97.82%   |
| 25        | 2500 | 25.6        | 99.00%   | 23        | 2500, 2800 | 51.2    | 98.30%   |
| 26        | 2500 | 25.6        | 98.54%   | 24_check  | 2500, 2800 | 51.2    | 99.39%   |
| 27_check  | 2500 | 25.6        | 99.29%   | 24        | 2500, 2800 | 102.4   | 99.38%   |
| 27        | 2500 | 51.2        | 99.25%   | 25        | 2500, 2800 | 102.4   | 98.98%   |
| 27_check  | 2500 | 51.2        | 99.17%   | 26        | 2500, 2800 | 102.4   | 98.97%   |
| 28        | 2500 | 102.4       | 98.80%   | 27        | 2500, 2800 | 102.4   | 99.11%   |
| 29        | 2500 | 102.4       | 93.76%   |           |            |         |          |
| 30        | 2500 | 102.4       | 99.03%   |           |            |         |          |

|          |      |       |        |  |  |  |  |
|----------|------|-------|--------|--|--|--|--|
| 31_check | 2500 | 102.4 | 99.20% |  |  |  |  |
|----------|------|-------|--------|--|--|--|--|

Continue with Table S2

|          |      |       |        |  |  |  |  |
|----------|------|-------|--------|--|--|--|--|
| 31       | 2800 | 102.4 | 98.72% |  |  |  |  |
| 32       | 2800 | 102.4 | 95.91% |  |  |  |  |
| 33_check | 2800 | 102.4 | 99.21% |  |  |  |  |

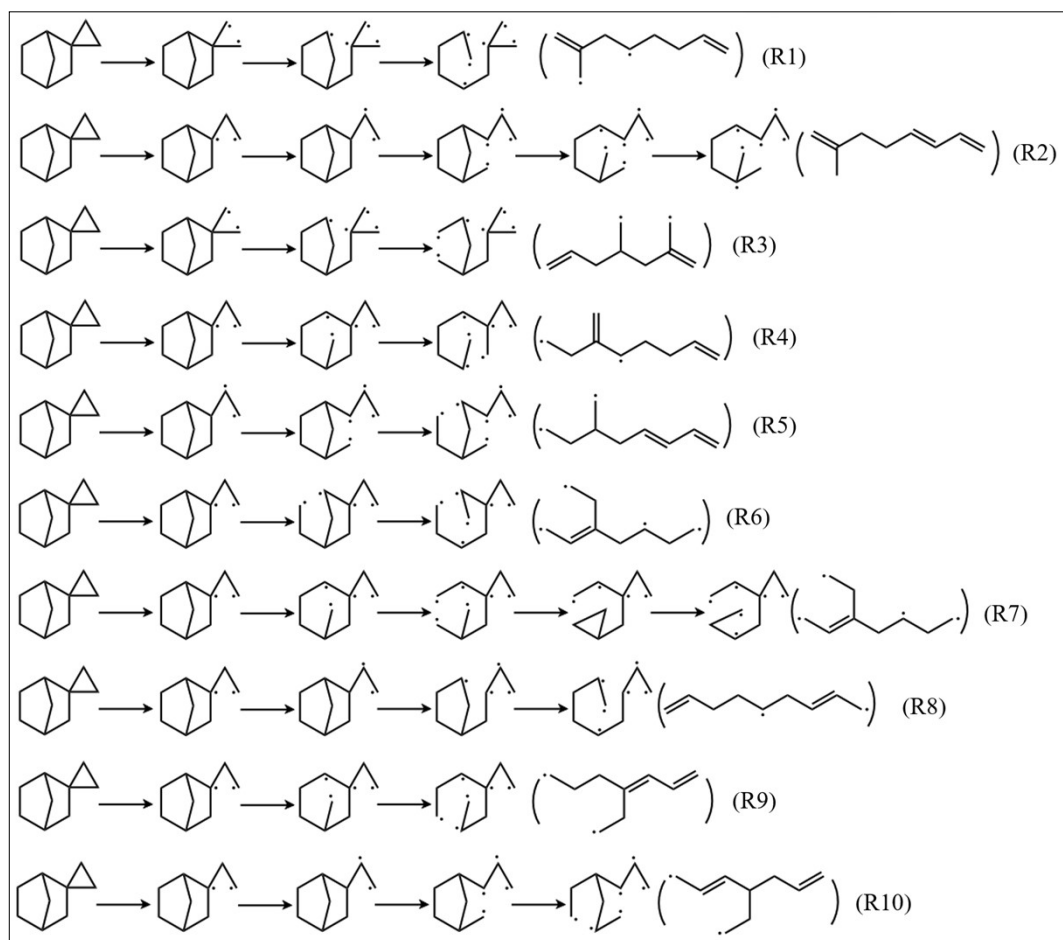

Scheme S1. Primary pathways of all structures of initial pyrolysis products of Fuel 2 at 2500K and 2800K. R1 and R2 are for structure a), R3 is for structure b), R4 and R5 are for structure c), R6 and R7 are for structure d), R8 is for structure e), R9 and R10 are for structure f).
